# Supplementary material for: Do Automated Peritoneal Dialysis and Continuous Ambulatory Peritoneal Dialysis Have the Same Clinical Outcomes? A Ten-year Cohort Study in Taiwan
Source: PubMed Central journal article supplement (PMC4937348; doi:10.1038/srep29276), 2016-07-08
Supplement: srep29276-s1.pdf [file srep29276-s1.pdf]

## Supplementary Online Content

### **Do Automated Peritoneal Dialysis and Continuous Ambulatory Peritoneal Dialysis Have the Same Clinical Outcomes? A Ten-year Cohort Study in Taiwan**

**Tang CH, Chen TH, Fang TC, Huang SY, Huang KC, Wu YT, Wang CC, Sue YM**

**Table S1.** The logistic regression model used to calculate propensity scores.

**Table S2.** Distribution of propensity scores among APD and CAPD patients in the full and matched cohorts.

**Table S3.** Annual peritoneal dialysis-related quantity of solution.

**Table S4.** Subgroup analysis of Cox proportional hazard regression for all-cause mortality and technique failure of APD and CAPD patients by cohort periods

**Table S5.** Hazard rates of all-cause mortality and technique failure in PD patients with delaying the index date to 120 days and regrouping the patients.

**Table S6.** Hazard rates of all-cause mortality and technique failure in PD patients with delaying the index date to 180 days and regrouping the patients.

**Figure S1.** Adjusted hazard ratios of APD to CAPD from the final Cox proportional hazard multivariate analysis for all-cause mortality and technique failure, by age groups.

This supplementary material has been provided by the authors to give readers additional information about their work.

**Table S1. The logistic regression model used to calculate propensity scores**

| Parameters                           | Estimate | Standard Error | Wald Chi-Square | OR (95% CI)         | p-value |
|--------------------------------------|----------|----------------|-----------------|---------------------|---------|
| Intercept                            | -1.3869  | 0.1601         | 75.0184         |                     | <0.0001 |
| Gender                               |          |                |                 |                     |         |
| Male                                 | 0.2889   | 0.0489         | 34.891          | 1.335 (1.213-1.469) | <0.0001 |
| Female                               | Ref      |                |                 |                     |         |
| Age at cohort entry, (y)             |          |                |                 |                     |         |
| <30                                  | Ref      |                |                 |                     |         |
| 30-39                                | -0.1735  | 0.1087         | 2.5455          | 0.841 (0.679-1.040) | 0.1106  |
| 40-49                                | -0.5133  | 0.1031         | 24.8035         | 0.598 (0.489-0.732) | <0.0001 |
| 50-59                                | -0.5650  | 0.1028         | 30.1864         | 0.568 (0.465-0.695) | <0.0001 |
| 60-69                                | -0.3912  | 0.108          | 13.1101         | 0.676 (0.547-0.836) | 0.0003  |
| ≥70                                  | -0.1675  | 0.1122         | 2.2284          | 0.846 (0.679-1.054) | 0.1355  |
| Charlson comorbidity index           |          |                |                 |                     |         |
| 0-2                                  | Ref      |                |                 |                     |         |
| 3-5                                  | 0.1739   | 0.0625         | 7.7548          | 1.190 (1.053-1.345) | 0.0054  |
| ≥6                                   | 0.2592   | 0.0967         | 7.1811          | 1.296 (1.072-1.566) | 0.0074  |
| Comorbidities                        |          |                |                 |                     |         |
| Diabetes mellitus                    | 0.00285  | 0.0865         | 0.0011          | 1.003 (0.846-1.188) | 0.9737  |
| Hypertension                         | 0.2827   | 0.0818         | 11.9547         | 1.327 (1.130-1.557) | 0.0005  |
| Dementia                             | -0.5253  | 0.2932         | 3.2103          | 0.591 (0.333-1.051) | 0.0732  |
| Cerebrovascular disease              | -0.0029  | 0.0863         | 0.0012          | 0.997 (0.842-1.181) | 0.9729  |
| Peripheral vascular disease          | -0.2388  | 0.2079         | 1.3194          | 0.788 (0.524-1.184) | 0.2507  |
| Cardiac dysrhythmia                  | -0.0061  | 0.1015         | 0.0037          | 0.994 (0.815-1.213) | 0.9518  |
| Ischemic heart disease               | -0.0790  | 0.0679         | 1.3522          | 0.924 (0.809-1.056) | 0.2449  |
| Myocardial infarction                | -0.0008  | 0.147          | 0               | 0.999 (0.749-1.333) | 0.9957  |
| Medications at cohort entry          |          |                |                 |                     |         |
| Anti-hypertension agents             | 0.0755   | 0.128          | 0.3477          | 1.078 (0.839-1.386) | 0.5554  |
| Anti-platelet agents                 | -0.1541  | 0.0556         | 7.6728          | 0.857 (0.769-0.956) | 0.0056  |
| Lipid-lowering agents                | 0.1625   | 0.0599         | 7.3553          | 1.176 (1.046-1.323) | 0.0067  |
| Oral hypoglycemic agents or insulins | 0.1008   | 0.0768         | 1.7246          | 1.106 (0.952-1.286) | 0.1891  |
| Premiums wages classes               |          |                |                 |                     |         |
| Class 1 ≤ USD 760                    | Ref      |                |                 |                     |         |
| Class 1 USD 761-1210                 | 0.1602   | 0.1072         | 2.2359          | 1.174 (0.951-1.448) | 0.1348  |
| Class 1 USD 1201-1927                | 0.1867   | 0.1018         | 3.3621          | 1.205 (0.987-1.471) | 0.0667  |
| Class 1 > USD 1927                   | 0.2156   | 0.1107         | 3.7925          | 1.241 (0.999-1.541) | 0.0515  |
| Class 2-class 6                      | -0.0431  | 0.0822         | 0.2745          | 0.958 (0.815-1.125) | 0.6004  |

CI, confidence interval; OR, odds ratio.

**Table S2. Distribution of propensity scores among APD and CAPD patients in the full and matched cohorts**

|                    | Full cohort |           | Matched cohort |           |
|--------------------|-------------|-----------|----------------|-----------|
|                    | APD         | CAPD      | APD            | CAPD      |
| No. of observation | 2,346       | 7,175     | 2,287          | 2,287     |
| Mean               | 0.2604850   | 0.2417982 | 0.2527183      | 0.2486964 |
| Standard deviation | 0.0582170   | 0.0591351 | 0.0396343      | 0.0391438 |
| Minimum            | 0.1214528   | 0.1044212 | 0.1488232      | 0.1450180 |
| Lower quartile     | 0.2185823   | 0.1966938 | 0.2251867      | 0.2216093 |
| Median             | 0.2566722   | 0.2378034 | 0.2541980      | 0.2521377 |
| Upper quartile     | 0.2991247   | 0.2814910 | 0.2794834      | 0.2743920 |
| Maximum            | 0.4651460   | 0.4394749 | 0.3711059      | 0.3845843 |

**Table S3. Annual peritoneal dialysis-related quantity of solution**

| Quantity of solution (L) | APD (n=2,287) |      |        |      | CAPD (n=2,287) |      |        |     | <i>p</i> -value   |
|--------------------------|---------------|------|--------|------|----------------|------|--------|-----|-------------------|
|                          | N             | Mean | Median | SD   | N              | Mean | Median | SD  |                   |
| Total quantity           | 2287          | 3530 | 3609   | 754  | 2287           | 2677 | 2751   | 670 | <0.001*           |
| 1.5% Dextrose            | 2235          | 1782 | 1728   | 1041 | 2069           | 1428 | 1395   | 836 | <0.001*           |
| 2.5% Dextrose            | 2211          | 1467 | 1474   | 964  | 2046           | 933  | 827    | 686 | <0.001*           |
| 4.25% Dextrose           | 930           | 121  | 27     | 230  | 853            | 85   | 25     | 146 | 0.16 <sup>†</sup> |
| Icodextrin               | 1333          | 434  | 502    | 265  | 1244           | 423  | 480    | 248 | 0.28*             |

Abbreviation: APD, automatic peritoneal dialysis; CAPD, continuous ambulatory peritoneal dialysis; SD, standard deviation.

\*Student's t-test.

<sup>†</sup>Wilcoxon rank-sum test.

**Table S4. Subgroup analysis of Cox proportional hazard regression for all-cause mortality and technique failure of APD and CAPD patients by cohort periods**

| Subgroups                                | APD*         |           |                 | CAPD*        |           |                 |
|------------------------------------------|--------------|-----------|-----------------|--------------|-----------|-----------------|
|                                          | HR           | 95% CI    | <i>p</i> -value | HR           | 95% CI    | <i>p</i> -value |
| All-cause mortality                      |              |           |                 |              |           |                 |
| 2001-2004, APD (n=400), CAPD (n=400)     | As reference |           |                 | As reference |           |                 |
| 2005-2007, APD (n=608), CAPD (n=608)     | 0.89         | 0.69-1.15 | 0.33            | 0.69         | 0.53-0.90 | <0.01           |
| 2008-2010, APD (n=1,279), CAPD (n=1,279) | 0.74         | 0.56-0.98 | 0.03            | 0.72         | 0.55-0.93 | 0.01            |
| Technique failure                        |              |           |                 |              |           |                 |
| 2001-2004, APD (n=400), CAPD (n=400)     | As reference |           |                 | As reference |           |                 |
| 2005-2007, APD (n=608), CAPD (n=608)     | 1.21         | 0.88-1.65 | 0.25            | 0.56         | 0.41-0.76 | <0.001          |
| 2008-2010, APD (n=1,279), CAPD (n=1,279) | 0.85         | 0.61-1.19 | 0.85            | 0.63         | 0.47-0.85 | <0.01           |

Abbreviation: APD, automatic peritoneal dialysis; CAPD, continuous ambulatory peritoneal dialysis; CI, confidence interval; HR, risk ratio.

\*The control variables included in the multivariate model were age, gender, diabetes mellitus, cirrhosis of liver, cerebrovascular disease, ischemic heart disease, chronic heart failure, events of peritonitis, icodextrin usage, and premiums wages classes.

**Table S5. Hazard rates of all-cause mortality and technique failure in PD patients with delaying the index date to 120 days and regrouping the patients**

| APD vs. CAPD outcomes                       | Univariate |           |                 | Multivariate* |           |                 |
|---------------------------------------------|------------|-----------|-----------------|---------------|-----------|-----------------|
|                                             | HR         | 95% CI    | <i>p</i> -value | HR            | 95% CI    | <i>p</i> -value |
| 2001-2010, APD (n=2,165) vs. CAPD (n=2,377) |            |           |                 |               |           |                 |
| All-cause mortality                         | 1.13       | 0.99-1.28 | 0.07            | 1.14          | 1.00-1.15 | 0.05            |
| Technique failure                           | 1.13       | 0.97-1.31 | 0.13            | 1.17          | 1.00-1.36 | 0.05            |
| 2001-2004, APD (n=374) vs. CAPD (n=421)     |            |           |                 |               |           |                 |
| All-cause mortality                         | 1.04       | 0.80-1.34 | 0.80            | 1.00          | 0.77-1.29 | 0.97            |
| Technique failure                           | 0.73       | 0.53-0.99 | 0.04            | 0.69          | 0.51-0.95 | 0.02            |
| 2005-2007, APD (n=562) vs. CAPD (n=644)     |            |           |                 |               |           |                 |
| All-cause mortality                         | 1.33       | 1.07-1.65 | 0.01            | 1.48          | 1.19-1.84 | <0.001          |
| Technique failure                           | 1.65       | 1.26-2.14 | <0.001          | 1.68          | 1.29-2.19 | 0.001           |
| 2008-2010, APD (n=1,229) vs. CAPD (n=1,312) |            |           |                 |               |           |                 |
| All-cause mortality                         | 1.04       | 0.85-1.26 | 0.72            | 0.981         | 0.81-1.19 | 0.84            |
| Technique failure                           | 1.09       | 0.86-1.38 | 0.47            | 1.16          | 0.91-1.46 | 0.23            |

Abbreviation: APD, automatic peritoneal dialysis; CAPD, continuous ambulatory peritoneal dialysis; CI, confidence interval; HR, risk ratio.

\*The control variables included in the multivariate model were age, gender, diabetes mellitus, cirrhosis of liver, cerebrovascular disease, ischemic heart disease, chronic heart failure, events of peritonitis, icodextrin usage, and premiums wages classes.

**Table S6. Hazard rates of all-cause mortality and technique failure in PD patients with delaying the index date to 180 days and regrouping the patients**

| APD vs. CAPD outcomes                       | Univariate |           |                 | Multivariate* |           |                 |
|---------------------------------------------|------------|-----------|-----------------|---------------|-----------|-----------------|
|                                             | HR         | 95% CI    | <i>p</i> -value | HR            | 95% CI    | <i>p</i> -value |
| 2001-2010, APD (n=2,017) vs. CAPD (n=2,387) |            |           |                 |               |           |                 |
| All-cause mortality                         | 1.19       | 1.04-1.35 | <0.01           | 1.21          | 1.06-1.38 | <0.01           |
| Technique failure                           | 1.10       | 0.94-1.28 | 0.26            | 1.14          | 0.97-1.34 | 0.11            |
| 2001-2004, APD (n=328) vs. CAPD (n=428)     |            |           |                 |               |           |                 |
| All-cause mortality                         | 1.18       | 0.90-1.54 | 0.23            | 1.18          | 0.90-1.53 | 0.22            |
| Technique failure                           | 0.72       | 0.52-1.01 | 0.05            | 0.71          | 0.51-0.99 | 0.04            |
| 2005-2007, APD (n=531) vs. CAPD (n=639)     |            |           |                 |               |           |                 |
| All-cause mortality                         | 1.17       | 1.05-1.31 | <0.01           | 1.53          | 1.22-1.92 | <0.001          |
| Technique failure                           | 1.16       | 1.01-1.33 | 0.03            | 1.40          | 1.07-1.84 | 0.02            |
| 2008-2010, APD (n=1,158) vs. CAPD (n=1,320) |            |           |                 |               |           |                 |
| All-cause mortality                         | 1.03       | 0.93-1.14 | 0.59            | 0.98          | 0.80-1.21 | 0.89            |
| Technique failure                           | 1.10       | 0.97-1.24 | 0.15            | 1.26          | 0.98-1.62 | 0.07            |

Abbreviation: APD, automatic peritoneal dialysis; CAPD, continuous ambulatory peritoneal dialysis; CI, confidence interval; HR, risk ratio.

\*The control variables included in the multivariate model were age, gender, diabetes mellitus, cirrhosis of liver, cerebrovascular disease, ischemic heart disease, chronic heart failure, events of peritonitis, icodextrin usage, and premiums wages classes.

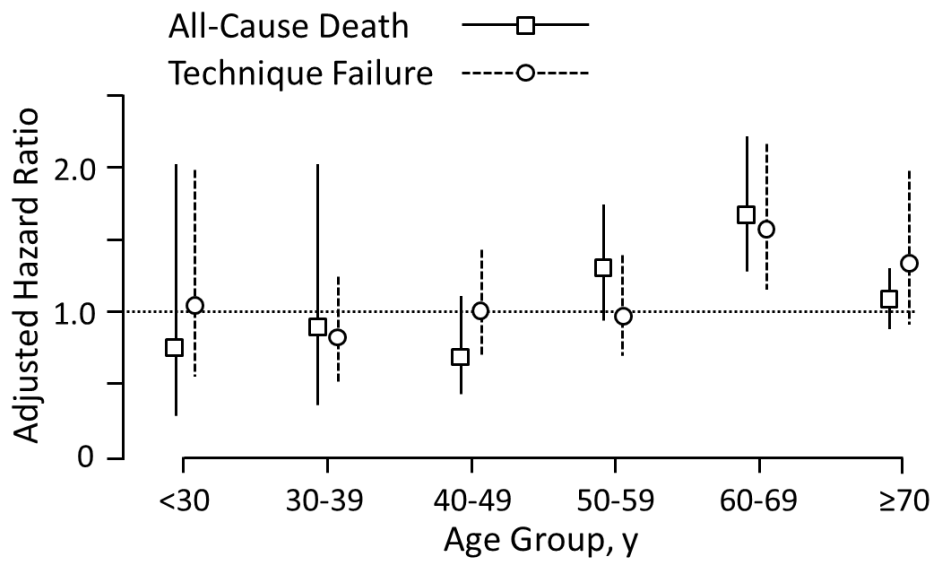

**Figure S1.** Adjusted hazard ratios of APD to CAPD from the final Cox proportional hazard multivariate analysis for all-cause mortality and technique failure, by age groups.
